# Supplementary material for: Value of genomics- and radiomics-based machine learning models in the identification of breast cancer molecular subtypes: a systematic review and meta-analysis
Source: PubMed Central journal article supplement — Ann Transl Med. 2022 Dec;10(24):1394. doi: 10.21037/atm-22-5986 (PMC9843333; doi:10.21037/atm-22-5986), 2022-12
Supplement: atm-10-24-1394-coif.pdf [file atm-10-24-1394-coif.pdf]

## ICMJE DISCLOSURE FORM

Date: 2022/11/28  
 Your Name: Yiwen Zhang  
 Manuscript Title: Value of machine learning in the identification of breast cancer molecular subtypes: a systematic review and meta-analysis  
 Manuscript number (if known): \_\_\_\_\_

In the interest of transparency, we ask you to disclose all relationships/activities/interests listed below that are related to the content of your manuscript. "Related" means any relation with for-profit or not-for-profit third parties whose interests may be affected by the content of the manuscript. Disclosure represents a commitment to transparency and does not necessarily indicate a bias. If you are in doubt about whether to list a relationship/activity/interest, it is preferable that you do so.

The following questions apply to the author's relationships/activities/interests as they relate to the current manuscript only.

The author's relationships/activities/interests should be defined broadly. For example, if your manuscript pertains to the epidemiology of hypertension, you should declare all relationships with manufacturers of antihypertensive medication, even if that medication is not mentioned in the manuscript.

In item #1 below, report all support for the work reported in this manuscript without time limit. For all other items, the time frame for disclosure is the past 36 months.

|                                                           |                                                                                                                                                                                | Name all entities with whom you have this relationship or indicate none (add rows as needed) | Specifications/Comments (e.g., if payments were made to you or to your institution) |
|-----------------------------------------------------------|--------------------------------------------------------------------------------------------------------------------------------------------------------------------------------|----------------------------------------------------------------------------------------------|-------------------------------------------------------------------------------------|
| <b>Time frame: Since the initial planning of the work</b> |                                                                                                                                                                                |                                                                                              |                                                                                     |
| 1                                                         | All support for the present manuscript (e.g., funding, provision of study materials, medical writing, article processing charges, etc.)<br><b>No time limit for this item.</b> | <input checked="" type="checkbox"/> None                                                     |                                                                                     |
|                                                           |                                                                                                                                                                                |                                                                                              |                                                                                     |
|                                                           |                                                                                                                                                                                |                                                                                              |                                                                                     |
|                                                           |                                                                                                                                                                                |                                                                                              |                                                                                     |
|                                                           |                                                                                                                                                                                |                                                                                              |                                                                                     |
| <b>Time frame: past 36 months</b>                         |                                                                                                                                                                                |                                                                                              |                                                                                     |
| 2                                                         | Grants or contracts from any entity (if not indicated in item #1 above).                                                                                                       | <input checked="" type="checkbox"/> None                                                     |                                                                                     |
|                                                           |                                                                                                                                                                                |                                                                                              |                                                                                     |
| 3                                                         | Royalties or licenses                                                                                                                                                          | <input checked="" type="checkbox"/> None                                                     |                                                                                     |
|                                                           |                                                                                                                                                                                |                                                                                              |                                                                                     |
| 4                                                         | Consulting fees                                                                                                                                                                | <input checked="" type="checkbox"/> None                                                     |                                                                                     |
|                                                           |                                                                                                                                                                                |                                                                                              |                                                                                     |

|    |                                                                                                              |                                          |  |
|----|--------------------------------------------------------------------------------------------------------------|------------------------------------------|--|
|    |                                                                                                              |                                          |  |
| 5  | Payment or honoraria for lectures, presentations, speakers bureaus, manuscript writing or educational events | <input checked="" type="checkbox"/> None |  |
| 6  | Payment for expert testimony                                                                                 | <input checked="" type="checkbox"/> None |  |
| 7  | Support for attending meetings and/or travel                                                                 | <input checked="" type="checkbox"/> None |  |
| 8  | Patents planned, issued or pending                                                                           | <input checked="" type="checkbox"/> None |  |
| 9  | Participation on a Data Safety Monitoring Board or Advisory Board                                            | <input checked="" type="checkbox"/> None |  |
| 10 | Leadership or fiduciary role in other board, society, committee or advocacy group, paid or unpaid            | <input checked="" type="checkbox"/> None |  |
| 11 | Stock or stock options                                                                                       | <input checked="" type="checkbox"/> None |  |
| 12 | Receipt of equipment, materials, drugs, medical writing, gifts or other services                             | <input checked="" type="checkbox"/> None |  |
| 13 | Other financial or non-financial interests                                                                   | <input checked="" type="checkbox"/> None |  |

**Please summarize the above conflict of interest in the following box:**

None

**Please place an "X" next to the following statement to indicate your agreement:**

I certify that I have answered every question and have not altered the wording of any of the questions on this

**form.**

## ICMJE DISCLOSURE FORM

Date: \_\_\_\_\_ 2022/11/28 \_\_\_\_\_  
 Your Name: \_\_\_\_\_ Guofeng Li \_\_\_\_\_  
 Manuscript Title: \_\_\_\_\_ Value of machine learning in the identification of breast cancer molecular subtypes: a systematic review and meta-analysis \_\_\_\_\_  
 Manuscript number (if known): \_\_\_\_\_

In the interest of transparency, we ask you to disclose all relationships/activities/interests listed below that are related to the content of your manuscript. "Related" means any relation with for-profit or not-for-profit third parties whose interests may be affected by the content of the manuscript. Disclosure represents a commitment to transparency and does not necessarily indicate a bias. If you are in doubt about whether to list a relationship/activity/interest, it is preferable that you do so.

The following questions apply to the author's relationships/activities/interests as they relate to the current manuscript only.

The author's relationships/activities/interests should be defined broadly. For example, if your manuscript pertains to the epidemiology of hypertension, you should declare all relationships with manufacturers of antihypertensive medication, even if that medication is not mentioned in the manuscript.

In item #1 below, report all support for the work reported in this manuscript without time limit. For all other items, the time frame for disclosure is the past 36 months.

|                                                           |                                                                                                                                                                                | Name all entities with whom you have this relationship or indicate none (add rows as needed) | Specifications/Comments (e.g., if payments were made to you or to your institution) |
|-----------------------------------------------------------|--------------------------------------------------------------------------------------------------------------------------------------------------------------------------------|----------------------------------------------------------------------------------------------|-------------------------------------------------------------------------------------|
| <b>Time frame: Since the initial planning of the work</b> |                                                                                                                                                                                |                                                                                              |                                                                                     |
| 1                                                         | All support for the present manuscript (e.g., funding, provision of study materials, medical writing, article processing charges, etc.)<br><b>No time limit for this item.</b> | <input checked="" type="checkbox"/> None                                                     |                                                                                     |
|                                                           |                                                                                                                                                                                |                                                                                              |                                                                                     |
|                                                           |                                                                                                                                                                                |                                                                                              |                                                                                     |
|                                                           |                                                                                                                                                                                |                                                                                              |                                                                                     |
|                                                           |                                                                                                                                                                                |                                                                                              |                                                                                     |
| <b>Time frame: past 36 months</b>                         |                                                                                                                                                                                |                                                                                              |                                                                                     |
| 2                                                         | Grants or contracts from any entity (if not indicated in item #1 above).                                                                                                       | <input checked="" type="checkbox"/> None                                                     |                                                                                     |
|                                                           |                                                                                                                                                                                |                                                                                              |                                                                                     |
| 3                                                         | Royalties or licenses                                                                                                                                                          | <input checked="" type="checkbox"/> None                                                     |                                                                                     |
|                                                           |                                                                                                                                                                                |                                                                                              |                                                                                     |
| 4                                                         | Consulting fees                                                                                                                                                                | <input checked="" type="checkbox"/> None                                                     |                                                                                     |
|                                                           |                                                                                                                                                                                |                                                                                              |                                                                                     |

|    |                                                                                                              |                                          |  |
|----|--------------------------------------------------------------------------------------------------------------|------------------------------------------|--|
|    |                                                                                                              |                                          |  |
| 5  | Payment or honoraria for lectures, presentations, speakers bureaus, manuscript writing or educational events | <input checked="" type="checkbox"/> None |  |
| 6  | Payment for expert testimony                                                                                 | <input checked="" type="checkbox"/> None |  |
| 7  | Support for attending meetings and/or travel                                                                 | <input checked="" type="checkbox"/> None |  |
| 8  | Patents planned, issued or pending                                                                           | <input checked="" type="checkbox"/> None |  |
| 9  | Participation on a Data Safety Monitoring Board or Advisory Board                                            | <input checked="" type="checkbox"/> None |  |
| 10 | Leadership or fiduciary role in other board, society, committee or advocacy group, paid or unpaid            | <input checked="" type="checkbox"/> None |  |
| 11 | Stock or stock options                                                                                       | <input checked="" type="checkbox"/> None |  |
| 12 | Receipt of equipment, materials, drugs, medical writing, gifts or other services                             | <input checked="" type="checkbox"/> None |  |
| 13 | Other financial or non-financial interests                                                                   | <input checked="" type="checkbox"/> None |  |

Please summarize the above conflict of interest in the following box:

None

Please place an "X" next to the following statement to indicate your agreement:

I certify that I have answered every question and have not altered the wording of any of the questions on this

**form.**

## ICMJE DISCLOSURE FORM

Date: 2022/11/28  
 Your Name: Wenqing Bian  
 Manuscript Title: Value of machine learning in the identification of breast cancer molecular subtypes: a systematic review and meta-analysis  
 Manuscript number (if known): \_\_\_\_\_

In the interest of transparency, we ask you to disclose all relationships/activities/interests listed below that are related to the content of your manuscript. "Related" means any relation with for-profit or not-for-profit third parties whose interests may be affected by the content of the manuscript. Disclosure represents a commitment to transparency and does not necessarily indicate a bias. If you are in doubt about whether to list a relationship/activity/interest, it is preferable that you do so.

The following questions apply to the author's relationships/activities/interests as they relate to the current manuscript only.

The author's relationships/activities/interests should be defined broadly. For example, if your manuscript pertains to the epidemiology of hypertension, you should declare all relationships with manufacturers of antihypertensive medication, even if that medication is not mentioned in the manuscript.

In item #1 below, report all support for the work reported in this manuscript without time limit. For all other items, the time frame for disclosure is the past 36 months.

|                                                           |                                                                                                                                                                                | Name all entities with whom you have this relationship or indicate none (add rows as needed) | Specifications/Comments (e.g., if payments were made to you or to your institution) |
|-----------------------------------------------------------|--------------------------------------------------------------------------------------------------------------------------------------------------------------------------------|----------------------------------------------------------------------------------------------|-------------------------------------------------------------------------------------|
| <b>Time frame: Since the initial planning of the work</b> |                                                                                                                                                                                |                                                                                              |                                                                                     |
| 1                                                         | All support for the present manuscript (e.g., funding, provision of study materials, medical writing, article processing charges, etc.)<br><b>No time limit for this item.</b> | <input checked="" type="checkbox"/> None                                                     |                                                                                     |
|                                                           |                                                                                                                                                                                |                                                                                              |                                                                                     |
|                                                           |                                                                                                                                                                                |                                                                                              |                                                                                     |
|                                                           |                                                                                                                                                                                |                                                                                              |                                                                                     |
|                                                           |                                                                                                                                                                                |                                                                                              |                                                                                     |
| <b>Time frame: past 36 months</b>                         |                                                                                                                                                                                |                                                                                              |                                                                                     |
| 2                                                         | Grants or contracts from any entity (if not indicated in item #1 above).                                                                                                       | <input checked="" type="checkbox"/> None                                                     |                                                                                     |
|                                                           |                                                                                                                                                                                |                                                                                              |                                                                                     |
| 3                                                         | Royalties or licenses                                                                                                                                                          | <input checked="" type="checkbox"/> None                                                     |                                                                                     |
|                                                           |                                                                                                                                                                                |                                                                                              |                                                                                     |
| 4                                                         | Consulting fees                                                                                                                                                                | <input checked="" type="checkbox"/> None                                                     |                                                                                     |
|                                                           |                                                                                                                                                                                |                                                                                              |                                                                                     |

|    |                                                                                                              |                                          |  |
|----|--------------------------------------------------------------------------------------------------------------|------------------------------------------|--|
|    |                                                                                                              |                                          |  |
| 5  | Payment or honoraria for lectures, presentations, speakers bureaus, manuscript writing or educational events | <input checked="" type="checkbox"/> None |  |
| 6  | Payment for expert testimony                                                                                 | <input checked="" type="checkbox"/> None |  |
| 7  | Support for attending meetings and/or travel                                                                 | <input checked="" type="checkbox"/> None |  |
| 8  | Patents planned, issued or pending                                                                           | <input checked="" type="checkbox"/> None |  |
| 9  | Participation on a Data Safety Monitoring Board or Advisory Board                                            | <input checked="" type="checkbox"/> None |  |
| 10 | Leadership or fiduciary role in other board, society, committee or advocacy group, paid or unpaid            | <input checked="" type="checkbox"/> None |  |
| 11 | Stock or stock options                                                                                       | <input checked="" type="checkbox"/> None |  |
| 12 | Receipt of equipment, materials, drugs, medical writing, gifts or other services                             | <input checked="" type="checkbox"/> None |  |
| 13 | Other financial or non-financial interests                                                                   | <input checked="" type="checkbox"/> None |  |

**Please summarize the above conflict of interest in the following box:**

None

**Please place an "X" next to the following statement to indicate your agreement:**

I certify that I have answered every question and have not altered the wording of any of the questions on this



**form.**

## ICMJE DISCLOSURE FORM

Date: 2022/11/28  
 Your Name: Yuzhuo Bai  
 Manuscript Title: Value of machine learning in the identification of breast cancer molecular subtypes: a systematic review and meta-analysis  
 Manuscript number (if known): \_\_\_\_\_

In the interest of transparency, we ask you to disclose all relationships/activities/interests listed below that are related to the content of your manuscript. "Related" means any relation with for-profit or not-for-profit third parties whose interests may be affected by the content of the manuscript. Disclosure represents a commitment to transparency and does not necessarily indicate a bias. If you are in doubt about whether to list a relationship/activity/interest, it is preferable that you do so.

The following questions apply to the author's relationships/activities/interests as they relate to the current manuscript only.

The author's relationships/activities/interests should be defined broadly. For example, if your manuscript pertains to the epidemiology of hypertension, you should declare all relationships with manufacturers of antihypertensive medication, even if that medication is not mentioned in the manuscript.

In item #1 below, report all support for the work reported in this manuscript without time limit. For all other items, the time frame for disclosure is the past 36 months.

|                                                           |                                                                                                                                                                                | Name all entities with whom you have this relationship or indicate none (add rows as needed) | Specifications/Comments (e.g., if payments were made to you or to your institution) |
|-----------------------------------------------------------|--------------------------------------------------------------------------------------------------------------------------------------------------------------------------------|----------------------------------------------------------------------------------------------|-------------------------------------------------------------------------------------|
| <b>Time frame: Since the initial planning of the work</b> |                                                                                                                                                                                |                                                                                              |                                                                                     |
| 1                                                         | All support for the present manuscript (e.g., funding, provision of study materials, medical writing, article processing charges, etc.)<br><b>No time limit for this item.</b> | <input checked="" type="checkbox"/> None                                                     |                                                                                     |
|                                                           |                                                                                                                                                                                |                                                                                              |                                                                                     |
|                                                           |                                                                                                                                                                                |                                                                                              |                                                                                     |
|                                                           |                                                                                                                                                                                |                                                                                              |                                                                                     |
|                                                           |                                                                                                                                                                                |                                                                                              |                                                                                     |
| <b>Time frame: past 36 months</b>                         |                                                                                                                                                                                |                                                                                              |                                                                                     |
| 2                                                         | Grants or contracts from any entity (if not indicated in item #1 above).                                                                                                       | <input checked="" type="checkbox"/> None                                                     |                                                                                     |
|                                                           |                                                                                                                                                                                |                                                                                              |                                                                                     |
| 3                                                         | Royalties or licenses                                                                                                                                                          | <input checked="" type="checkbox"/> None                                                     |                                                                                     |
|                                                           |                                                                                                                                                                                |                                                                                              |                                                                                     |
| 4                                                         | Consulting fees                                                                                                                                                                | <input checked="" type="checkbox"/> None                                                     |                                                                                     |
|                                                           |                                                                                                                                                                                |                                                                                              |                                                                                     |

|    |                                                                                                              |                                          |  |
|----|--------------------------------------------------------------------------------------------------------------|------------------------------------------|--|
|    |                                                                                                              |                                          |  |
| 5  | Payment or honoraria for lectures, presentations, speakers bureaus, manuscript writing or educational events | <input checked="" type="checkbox"/> None |  |
| 6  | Payment for expert testimony                                                                                 | <input checked="" type="checkbox"/> None |  |
| 7  | Support for attending meetings and/or travel                                                                 | <input checked="" type="checkbox"/> None |  |
| 8  | Patents planned, issued or pending                                                                           | <input checked="" type="checkbox"/> None |  |
| 9  | Participation on a Data Safety Monitoring Board or Advisory Board                                            | <input checked="" type="checkbox"/> None |  |
| 10 | Leadership or fiduciary role in other board, society, committee or advocacy group, paid or unpaid            | <input checked="" type="checkbox"/> None |  |
| 11 | Stock or stock options                                                                                       | <input checked="" type="checkbox"/> None |  |
| 12 | Receipt of equipment, materials, drugs, medical writing, gifts or other services                             | <input checked="" type="checkbox"/> None |  |
| 13 | Other financial or non-financial interests                                                                   | <input checked="" type="checkbox"/> None |  |

Please summarize the above conflict of interest in the following box:

None

Please place an "X" next to the following statement to indicate your agreement:

I certify that I have answered every question and have not altered the wording of any of the questions on this

**form.**

## ICMJE DISCLOSURE FORM

Date: 2022/11/28

Your Name: Shuangyan He

Manuscript Title: Value of machine learning in the identification of breast cancer molecular subtypes: a systematic review and meta-analysis

Manuscript number (if known): \_\_\_\_\_

In the interest of transparency, we ask you to disclose all relationships/activities/interests listed below that are related to the content of your manuscript. "Related" means any relation with for-profit or not-for-profit third parties whose interests may be affected by the content of the manuscript. Disclosure represents a commitment to transparency and does not necessarily indicate a bias. If you are in doubt about whether to list a relationship/activity/interest, it is preferable that you do so.

The following questions apply to the author's relationships/activities/interests as they relate to the current manuscript only.

The author's relationships/activities/interests should be defined broadly. For example, if your manuscript pertains to the epidemiology of hypertension, you should declare all relationships with manufacturers of antihypertensive medication, even if that medication is not mentioned in the manuscript.

In item #1 below, report all support for the work reported in this manuscript without time limit. For all other items, the time frame for disclosure is the past 36 months.

|                                                           |                                                                                                                                                                                | Name all entities with whom you have this relationship or indicate none (add rows as needed) | Specifications/Comments (e.g., if payments were made to you or to your institution) |
|-----------------------------------------------------------|--------------------------------------------------------------------------------------------------------------------------------------------------------------------------------|----------------------------------------------------------------------------------------------|-------------------------------------------------------------------------------------|
| <b>Time frame: Since the initial planning of the work</b> |                                                                                                                                                                                |                                                                                              |                                                                                     |
| 1                                                         | All support for the present manuscript (e.g., funding, provision of study materials, medical writing, article processing charges, etc.)<br><b>No time limit for this item.</b> | <input checked="" type="checkbox"/> None                                                     |                                                                                     |
|                                                           |                                                                                                                                                                                |                                                                                              |                                                                                     |
|                                                           |                                                                                                                                                                                |                                                                                              |                                                                                     |
|                                                           |                                                                                                                                                                                |                                                                                              |                                                                                     |
|                                                           |                                                                                                                                                                                |                                                                                              |                                                                                     |
| <b>Time frame: past 36 months</b>                         |                                                                                                                                                                                |                                                                                              |                                                                                     |
| 2                                                         | Grants or contracts from any entity (if not indicated in item #1 above).                                                                                                       | <input checked="" type="checkbox"/> None                                                     |                                                                                     |
|                                                           |                                                                                                                                                                                |                                                                                              |                                                                                     |
| 3                                                         | Royalties or licenses                                                                                                                                                          | <input checked="" type="checkbox"/> None                                                     |                                                                                     |
|                                                           |                                                                                                                                                                                |                                                                                              |                                                                                     |
| 4                                                         | Consulting fees                                                                                                                                                                | <input checked="" type="checkbox"/> None                                                     |                                                                                     |
|                                                           |                                                                                                                                                                                |                                                                                              |                                                                                     |

|    |                                                                                                              |                                          |  |
|----|--------------------------------------------------------------------------------------------------------------|------------------------------------------|--|
|    |                                                                                                              |                                          |  |
| 5  | Payment or honoraria for lectures, presentations, speakers bureaus, manuscript writing or educational events | <input checked="" type="checkbox"/> None |  |
| 6  | Payment for expert testimony                                                                                 | <input checked="" type="checkbox"/> None |  |
| 7  | Support for attending meetings and/or travel                                                                 | <input checked="" type="checkbox"/> None |  |
| 8  | Patents planned, issued or pending                                                                           | <input checked="" type="checkbox"/> None |  |
| 9  | Participation on a Data Safety Monitoring Board or Advisory Board                                            | <input checked="" type="checkbox"/> None |  |
| 10 | Leadership or fiduciary role in other board, society, committee or advocacy group, paid or unpaid            | <input checked="" type="checkbox"/> None |  |
| 11 | Stock or stock options                                                                                       | <input checked="" type="checkbox"/> None |  |
| 12 | Receipt of equipment, materials, drugs, medical writing, gifts or other services                             | <input checked="" type="checkbox"/> None |  |
| 13 | Other financial or non-financial interests                                                                   | <input checked="" type="checkbox"/> None |  |

Please summarize the above conflict of interest in the following box:

None

Please place an "X" next to the following statement to indicate your agreement:

I certify that I have answered every question and have not altered the wording of any of the questions on this

**form.**

## ICMJE DISCLOSURE FORM

Date: 2022/11/28  
 Your Name: Yulian Liu  
 Manuscript Title: Value of machine learning in the identification of breast cancer molecular subtypes: a systematic review and meta-analysis  
 Manuscript number (if known): \_\_\_\_\_

In the interest of transparency, we ask you to disclose all relationships/activities/interests listed below that are related to the content of your manuscript. "Related" means any relation with for-profit or not-for-profit third parties whose interests may be affected by the content of the manuscript. Disclosure represents a commitment to transparency and does not necessarily indicate a bias. If you are in doubt about whether to list a relationship/activity/interest, it is preferable that you do so.

The following questions apply to the author's relationships/activities/interests as they relate to the current manuscript only.

The author's relationships/activities/interests should be defined broadly. For example, if your manuscript pertains to the epidemiology of hypertension, you should declare all relationships with manufacturers of antihypertensive medication, even if that medication is not mentioned in the manuscript.

In item #1 below, report all support for the work reported in this manuscript without time limit. For all other items, the time frame for disclosure is the past 36 months.

|                                                           |                                                                                                                                                                                | Name all entities with whom you have this relationship or indicate none (add rows as needed) | Specifications/Comments (e.g., if payments were made to you or to your institution) |
|-----------------------------------------------------------|--------------------------------------------------------------------------------------------------------------------------------------------------------------------------------|----------------------------------------------------------------------------------------------|-------------------------------------------------------------------------------------|
| <b>Time frame: Since the initial planning of the work</b> |                                                                                                                                                                                |                                                                                              |                                                                                     |
| 1                                                         | All support for the present manuscript (e.g., funding, provision of study materials, medical writing, article processing charges, etc.)<br><b>No time limit for this item.</b> | <input checked="" type="checkbox"/> None                                                     |                                                                                     |
|                                                           |                                                                                                                                                                                |                                                                                              |                                                                                     |
|                                                           |                                                                                                                                                                                |                                                                                              |                                                                                     |
|                                                           |                                                                                                                                                                                |                                                                                              |                                                                                     |
|                                                           |                                                                                                                                                                                |                                                                                              |                                                                                     |
| <b>Time frame: past 36 months</b>                         |                                                                                                                                                                                |                                                                                              |                                                                                     |
| 2                                                         | Grants or contracts from any entity (if not indicated in item #1 above).                                                                                                       | <input checked="" type="checkbox"/> None                                                     |                                                                                     |
|                                                           |                                                                                                                                                                                |                                                                                              |                                                                                     |
| 3                                                         | Royalties or licenses                                                                                                                                                          | <input checked="" type="checkbox"/> None                                                     |                                                                                     |
|                                                           |                                                                                                                                                                                |                                                                                              |                                                                                     |
| 4                                                         | Consulting fees                                                                                                                                                                | <input checked="" type="checkbox"/> None                                                     |                                                                                     |
|                                                           |                                                                                                                                                                                |                                                                                              |                                                                                     |



|    |                                                                                                              |                                          |  |
|----|--------------------------------------------------------------------------------------------------------------|------------------------------------------|--|
|    |                                                                                                              |                                          |  |
| 5  | Payment or honoraria for lectures, presentations, speakers bureaus, manuscript writing or educational events | <input checked="" type="checkbox"/> None |  |
| 6  | Payment for expert testimony                                                                                 | <input checked="" type="checkbox"/> None |  |
| 7  | Support for attending meetings and/or travel                                                                 | <input checked="" type="checkbox"/> None |  |
| 8  | Patents planned, issued or pending                                                                           | <input checked="" type="checkbox"/> None |  |
| 9  | Participation on a Data Safety Monitoring Board or Advisory Board                                            | <input checked="" type="checkbox"/> None |  |
| 10 | Leadership or fiduciary role in other board, society, committee or advocacy group, paid or unpaid            | <input checked="" type="checkbox"/> None |  |
| 11 | Stock or stock options                                                                                       | <input checked="" type="checkbox"/> None |  |
| 12 | Receipt of equipment, materials, drugs, medical writing, gifts or other services                             | <input checked="" type="checkbox"/> None |  |
| 13 | Other financial or non-financial interests                                                                   | <input checked="" type="checkbox"/> None |  |

**Please summarize the above conflict of interest in the following box:**

None

**Please place an "X" next to the following statement to indicate your agreement:**

I certify that I have answered every question and have not altered the wording of any of the questions on this

**form.**

## ICMJE DISCLOSURE FORM

Date: 2022/11/28  
 Your Name: Huan Liu  
 Manuscript Title: Value of machine learning in the identification of breast cancer molecular subtypes: a systematic review and meta-analysis  
 Manuscript number (if known): \_\_\_\_\_

In the interest of transparency, we ask you to disclose all relationships/activities/interests listed below that are related to the content of your manuscript. "Related" means any relation with for-profit or not-for-profit third parties whose interests may be affected by the content of the manuscript. Disclosure represents a commitment to transparency and does not necessarily indicate a bias. If you are in doubt about whether to list a relationship/activity/interest, it is preferable that you do so.

The following questions apply to the author's relationships/activities/interests as they relate to the current manuscript only.

The author's relationships/activities/interests should be defined broadly. For example, if your manuscript pertains to the epidemiology of hypertension, you should declare all relationships with manufacturers of antihypertensive medication, even if that medication is not mentioned in the manuscript.

In item #1 below, report all support for the work reported in this manuscript without time limit. For all other items, the time frame for disclosure is the past 36 months.

|                                                           |                                                                                                                                                                                | Name all entities with whom you have this relationship or indicate none (add rows as needed) | Specifications/Comments (e.g., if payments were made to you or to your institution) |
|-----------------------------------------------------------|--------------------------------------------------------------------------------------------------------------------------------------------------------------------------------|----------------------------------------------------------------------------------------------|-------------------------------------------------------------------------------------|
| <b>Time frame: Since the initial planning of the work</b> |                                                                                                                                                                                |                                                                                              |                                                                                     |
| 1                                                         | All support for the present manuscript (e.g., funding, provision of study materials, medical writing, article processing charges, etc.)<br><b>No time limit for this item.</b> | <input checked="" type="checkbox"/> None                                                     |                                                                                     |
|                                                           |                                                                                                                                                                                |                                                                                              |                                                                                     |
|                                                           |                                                                                                                                                                                |                                                                                              |                                                                                     |
|                                                           |                                                                                                                                                                                |                                                                                              |                                                                                     |
|                                                           |                                                                                                                                                                                |                                                                                              |                                                                                     |
| <b>Time frame: past 36 months</b>                         |                                                                                                                                                                                |                                                                                              |                                                                                     |
| 2                                                         | Grants or contracts from any entity (if not indicated in item #1 above).                                                                                                       | <input checked="" type="checkbox"/> None                                                     |                                                                                     |
|                                                           |                                                                                                                                                                                |                                                                                              |                                                                                     |
| 3                                                         | Royalties or licenses                                                                                                                                                          | <input checked="" type="checkbox"/> None                                                     |                                                                                     |
|                                                           |                                                                                                                                                                                |                                                                                              |                                                                                     |
| 4                                                         | Consulting fees                                                                                                                                                                | <input checked="" type="checkbox"/> None                                                     |                                                                                     |
|                                                           |                                                                                                                                                                                |                                                                                              |                                                                                     |

|    |                                                                                                              |                                          |  |
|----|--------------------------------------------------------------------------------------------------------------|------------------------------------------|--|
|    |                                                                                                              |                                          |  |
| 5  | Payment or honoraria for lectures, presentations, speakers bureaus, manuscript writing or educational events | <input checked="" type="checkbox"/> None |  |
| 6  | Payment for expert testimony                                                                                 | <input checked="" type="checkbox"/> None |  |
| 7  | Support for attending meetings and/or travel                                                                 | <input checked="" type="checkbox"/> None |  |
| 8  | Patents planned, issued or pending                                                                           | <input checked="" type="checkbox"/> None |  |
| 9  | Participation on a Data Safety Monitoring Board or Advisory Board                                            | <input checked="" type="checkbox"/> None |  |
| 10 | Leadership or fiduciary role in other board, society, committee or advocacy group, paid or unpaid            | <input checked="" type="checkbox"/> None |  |
| 11 | Stock or stock options                                                                                       | <input checked="" type="checkbox"/> None |  |
| 12 | Receipt of equipment, materials, drugs, medical writing, gifts or other services                             | <input checked="" type="checkbox"/> None |  |
| 13 | Other financial or non-financial interests                                                                   | <input checked="" type="checkbox"/> None |  |

**Please summarize the above conflict of interest in the following box:**

None

**Please place an "X" next to the following statement to indicate your agreement:**

I certify that I have answered every question and have not altered the wording of any of the questions on this

**form.**

## ICMJE DISCLOSURE FORM

Date: 2022/11/28  
 Your Name: Jiaqi Liu  
 Manuscript Title: Value of machine learning in the identification of breast cancer molecular subtypes: a systematic review and meta-analysis  
 Manuscript number (if known): \_\_\_\_\_

In the interest of transparency, we ask you to disclose all relationships/activities/interests listed below that are related to the content of your manuscript. "Related" means any relation with for-profit or not-for-profit third parties whose interests may be affected by the content of the manuscript. Disclosure represents a commitment to transparency and does not necessarily indicate a bias. If you are in doubt about whether to list a relationship/activity/interest, it is preferable that you do so.

The following questions apply to the author's relationships/activities/interests as they relate to the current manuscript only.

The author's relationships/activities/interests should be defined broadly. For example, if your manuscript pertains to the epidemiology of hypertension, you should declare all relationships with manufacturers of antihypertensive medication, even if that medication is not mentioned in the manuscript.

In item #1 below, report all support for the work reported in this manuscript without time limit. For all other items, the time frame for disclosure is the past 36 months.

|                                                           |                                                                                                                                                                                | Name all entities with whom you have this relationship or indicate none (add rows as needed) | Specifications/Comments (e.g., if payments were made to you or to your institution) |
|-----------------------------------------------------------|--------------------------------------------------------------------------------------------------------------------------------------------------------------------------------|----------------------------------------------------------------------------------------------|-------------------------------------------------------------------------------------|
| <b>Time frame: Since the initial planning of the work</b> |                                                                                                                                                                                |                                                                                              |                                                                                     |
| 1                                                         | All support for the present manuscript (e.g., funding, provision of study materials, medical writing, article processing charges, etc.)<br><b>No time limit for this item.</b> | <input checked="" type="checkbox"/> None                                                     |                                                                                     |
|                                                           |                                                                                                                                                                                |                                                                                              |                                                                                     |
|                                                           |                                                                                                                                                                                |                                                                                              |                                                                                     |
|                                                           |                                                                                                                                                                                |                                                                                              |                                                                                     |
|                                                           |                                                                                                                                                                                |                                                                                              |                                                                                     |
| <b>Time frame: past 36 months</b>                         |                                                                                                                                                                                |                                                                                              |                                                                                     |
| 2                                                         | Grants or contracts from any entity (if not indicated in item #1 above).                                                                                                       | <input checked="" type="checkbox"/> None                                                     |                                                                                     |
|                                                           |                                                                                                                                                                                |                                                                                              |                                                                                     |
| 3                                                         | Royalties or licenses                                                                                                                                                          | <input checked="" type="checkbox"/> None                                                     |                                                                                     |
|                                                           |                                                                                                                                                                                |                                                                                              |                                                                                     |
| 4                                                         | Consulting fees                                                                                                                                                                | <input checked="" type="checkbox"/> None                                                     |                                                                                     |
|                                                           |                                                                                                                                                                                |                                                                                              |                                                                                     |

|    |                                                                                                              |                                          |  |
|----|--------------------------------------------------------------------------------------------------------------|------------------------------------------|--|
|    |                                                                                                              |                                          |  |
| 5  | Payment or honoraria for lectures, presentations, speakers bureaus, manuscript writing or educational events | <input checked="" type="checkbox"/> None |  |
| 6  | Payment for expert testimony                                                                                 | <input checked="" type="checkbox"/> None |  |
| 7  | Support for attending meetings and/or travel                                                                 | <input checked="" type="checkbox"/> None |  |
| 8  | Patents planned, issued or pending                                                                           | <input checked="" type="checkbox"/> None |  |
| 9  | Participation on a Data Safety Monitoring Board or Advisory Board                                            | <input checked="" type="checkbox"/> None |  |
| 10 | Leadership or fiduciary role in other board, society, committee or advocacy group, paid or unpaid            | <input checked="" type="checkbox"/> None |  |
| 11 | Stock or stock options                                                                                       | <input checked="" type="checkbox"/> None |  |
| 12 | Receipt of equipment, materials, drugs, medical writing, gifts or other services                             | <input checked="" type="checkbox"/> None |  |
| 13 | Other financial or non-financial interests                                                                   | <input checked="" type="checkbox"/> None |  |

**Please summarize the above conflict of interest in the following box:**

None

**Please place an "X" next to the following statement to indicate your agreement:**

I certify that I have answered every question and have not altered the wording of any of the questions on this

**form.**
