# Supplementary material for: Value of genomics- and radiomics-based machine learning models in the identification of breast cancer molecular subtypes: a systematic review and meta-analysis
Source: PubMed Central journal article supplement — Ann Transl Med. 2022 Dec;10(24):1394. doi: 10.21037/atm-22-5986 (PMC9843333; doi:10.21037/atm-22-5986), 2022-12
Supplement: atm-10-24-1394-supplementary.pdf [file atm-10-24-1394-supplementary.pdf]

**Table S1** Literature search strategy

## 1. PubMed

| Search number | Query                                                                                                                                                                                                                                                                                                                                                                                                                                                                                                                                                                                                                                                                                                                                                                                                                                                                                                                                                                                                                                                                                                                                                                                                                                                                                                                                                                                                                                                                                                                                                                                                                                                                                                                                            | Results |
|---------------|--------------------------------------------------------------------------------------------------------------------------------------------------------------------------------------------------------------------------------------------------------------------------------------------------------------------------------------------------------------------------------------------------------------------------------------------------------------------------------------------------------------------------------------------------------------------------------------------------------------------------------------------------------------------------------------------------------------------------------------------------------------------------------------------------------------------------------------------------------------------------------------------------------------------------------------------------------------------------------------------------------------------------------------------------------------------------------------------------------------------------------------------------------------------------------------------------------------------------------------------------------------------------------------------------------------------------------------------------------------------------------------------------------------------------------------------------------------------------------------------------------------------------------------------------------------------------------------------------------------------------------------------------------------------------------------------------------------------------------------------------|---------|
| #1            | "Breast Neoplasms" [Mesh]                                                                                                                                                                                                                                                                                                                                                                                                                                                                                                                                                                                                                                                                                                                                                                                                                                                                                                                                                                                                                                                                                                                                                                                                                                                                                                                                                                                                                                                                                                                                                                                                                                                                                                                        | 326,583 |
| #2            | ((((((((((((((((((((((Breast Neoplasms [Title/Abstract]) OR (Breast Neoplasm [Title/Abstract])) OR (Neoplasm, Breast [Title/Abstract])) OR ("Breast Tumors" [Title/Abstract])) OR ("Breast Tumor" [Title/Abstract])) OR ("Tumor, Breast" [Title/Abstract])) OR ("Tumors, Breast" [Title/Abstract])) OR (Neoplasms, Breast [Title/Abstract])) OR (Breast Cancer [Title/Abstract])) OR (Cancer, Breast [Title/Abstract])) OR (Mammary Cancer [Title/Abstract])) OR (Cancer, Mammary [Title/Abstract])) OR (Cancers, Mammary [Title/Abstract])) OR (Mammary Cancers [Title/Abstract])) OR (Malignant Neoplasm of Breast [Title/Abstract])) OR (Breast Malignant Neoplasm [Title/Abstract])) OR (Breast Malignant Neoplasms [Title/Abstract])) OR (Malignant Tumor of Breast [Title/Abstract])) OR ("Breast Malignant Tumor" [Title/Abstract])) OR ("Breast Malignant Tumors" [Title/Abstract])) OR (Cancer of Breast [Title/Abstract])) OR (Cancer of the Breast [Title/Abstract])) OR (Mammary Carcinoma, Human [Title/Abstract])) OR (Carcinoma, Human Mammary [Title/Abstract])) OR (Carcinomas, Human Mammary [Title/Abstract])) OR (Human Mammary Carcinomas [Title/Abstract])) OR (Mammary Carcinomas, Human [Title/Abstract])) OR (Human Mammary Carcinoma [Title/Abstract])) OR (Mammary Neoplasms, Human [Title/Abstract])) OR (Human Mammary Neoplasm [Title/Abstract])) OR (Human Mammary Neoplasms [Title/Abstract])) OR (Neoplasm, Human Mammary [Title/Abstract])) OR (Neoplasms, Human Mammary [Title/Abstract])) OR (Mammary Neoplasm, Human [Title/Abstract])) OR (Breast Carcinoma [Title/Abstract])) OR (Breast Carcinomas [Title/Abstract])) OR (Carcinoma, Breast [Title/Abstract])) OR (Carcinomas, Breast [Title/Abstract])) | 346,336 |
| #3            | #1 OR #2                                                                                                                                                                                                                                                                                                                                                                                                                                                                                                                                                                                                                                                                                                                                                                                                                                                                                                                                                                                                                                                                                                                                                                                                                                                                                                                                                                                                                                                                                                                                                                                                                                                                                                                                         | 425,268 |
| #4            | "Machine Learning" [Mesh]                                                                                                                                                                                                                                                                                                                                                                                                                                                                                                                                                                                                                                                                                                                                                                                                                                                                                                                                                                                                                                                                                                                                                                                                                                                                                                                                                                                                                                                                                                                                                                                                                                                                                                                        | 44,716  |
| #5            | ((((((((((((((((((((((machine learning [Title/Abstract]) OR (Transfer Learning [Title/Abstract])) OR (Deep learning [Title/Abstract])) OR (Ensemble Learning [Title/Abstract])) OR (artificial intelligence [Title/Abstract])) OR (Prediction model [Title/Abstract])) OR ("random forest" [Title/Abstract])) OR (artificial neural network [Title/Abstract])) OR ("Support vector machine" [Title/Abstract])) OR (SVM [Title/Abstract])) OR (Gradient Boosting Machine [Title/Abstract])) OR (Nomogram [Title/Abstract])) OR (XGboost [Title/Abstract])) OR (Decision tree [Title/Abstract])) OR (External validation [Title/Abstract]))                                                                                                                                                                                                                                                                                                                                                                                                                                                                                                                                                                                                                                                                                                                                                                                                                                                                                                                                                                                                                                                                                                        | 167,230 |
| #6            | #4 OR #5                                                                                                                                                                                                                                                                                                                                                                                                                                                                                                                                                                                                                                                                                                                                                                                                                                                                                                                                                                                                                                                                                                                                                                                                                                                                                                                                                                                                                                                                                                                                                                                                                                                                                                                                         | 173,167 |
| #7            | (((((((((Subtype [Title/Abstract]) OR (HR-Positive [Title/Abstract])) OR (HR-Negative [Title/Abstract])) OR (ERBB2-Positive [Title/Abstract])) OR (ERBB2-Negative [Title/Abstract])) OR (Triple-Negative Breast Cancer [Title/Abstract])) OR (Triple Negative Breast Cancer [Title/Abstract])) OR (Luminal A [Title/Abstract])) OR (Luminal B [Title/Abstract])) OR (HER 2 [Title/Abstract]))                                                                                                                                                                                                                                                                                                                                                                                                                                                                                                                                                                                                                                                                                                                                                                                                                                                                                                                                                                                                                                                                                                                                                                                                                                                                                                                                                    | 140,867 |
| #8            | #3 AND #6 AND #7                                                                                                                                                                                                                                                                                                                                                                                                                                                                                                                                                                                                                                                                                                                                                                                                                                                                                                                                                                                                                                                                                                                                                                                                                                                                                                                                                                                                                                                                                                                                                                                                                                                                                                                                 | 481     |

2. Cochrane

| Search number | Query                                                                                                                                                                                            | Results |
|---------------|--------------------------------------------------------------------------------------------------------------------------------------------------------------------------------------------------|---------|
| #1            | MeSH descriptor: [Breast Neoplasms] explode all trees                                                                                                                                            | 14709   |
| #2            | (Breast Neoplasms):ti,ab,kw OR (Breast Neoplasm):ti,ab,kw OR (Neoplasm, Breast):ti,ab,kw OR (Breast Tumors):ti,ab,kw OR (Breast Tumor):ti,ab,kw                                                  | 25207   |
| #3            | (Tumor, Breast):ti,ab,kw OR (Tumors, Breast):ti,ab,kw OR (Neoplasms, Breast):ti,ab,kw OR (Breast Cancer):ti,ab,kw OR (Cancer, Breast):ti,ab,kw                                                   | 41903   |
| #4            | (Mammary Cancer):ti,ab,kw OR (Cancer, Mammary):ti,ab,kw OR (Cancers, Mammary):ti,ab,kw OR (Mammary Cancers):ti,ab,kw OR (Malignant Neoplasm of Breast):ti,ab,kw                                  | 1579    |
| #5            | (Breast Malignant Neoplasm):ti,ab,kw OR (Breast Malignant Neoplasms):ti,ab,kw OR (Malignant Tumor of Breast):ti,ab,kw OR (Breast Malignant Tumor):ti,ab,kw OR (Breast Malignant Tumors):ti,ab,kw | 1864    |
| #6            | (Cancer of Breast):ti,ab,kw OR (Cancer of the Breast):ti,ab,kw OR (Mammary Carcinoma, Human):ti,ab,kw OR (Carcinoma, Human Mammary):ti,ab,kw OR (Carcinomas, Human Mammary):ti,ab,kw             | 38268   |
| #7            | (Human Mammary Carcinomas):ti,ab,kw OR (Mammary Carcinomas, Human):ti,ab,kw OR (Human Mammary Carcinoma):ti,ab,kw OR (Mammary Neoplasms, Human):ti,ab,kw OR (Human Mammary Neoplasm):ti,ab,kw    | 134     |
| #8            | (Human Mammary Neoplasms):ti,ab,kw OR (Neoplasm, Human Mammary):ti,ab,kw OR (Neoplasms, Human Mammary):ti,ab,kw OR (Mammary Neoplasm, Human):ti,ab,kw OR (Breast Carcinoma):ti,ab,kw             | 4168    |
| #9            | (Breast Carcinomas):ti,ab,kw OR (Carcinoma, Breast):ti,ab,kw OR (Carcinomas, Breast):ti,ab,kw                                                                                                    | 4207    |
| #10           | #1 or #2 or #3 or #4 or #5 or #6 or #7 or #8 or #9                                                                                                                                               | 42355   |
| #11           | MeSH descriptor: [Machine Learning] explode all trees                                                                                                                                            | 252     |
| #12           | (machine learning):ti,ab,kw OR (Transfer Learning):ti,ab,kw OR (Deep learning):ti,ab,kw OR (Ensemble Learning):ti,ab,kw OR (artificial intelligence):ti,ab,kw                                    | 4960    |
| #13           | (Prediction model):ti,ab,kw OR (random forest):ti,ab,kw OR (artificial neural network):ti,ab,kw OR (Support vector machine):ti,ab,kw OR (SVM):ti,ab,kw                                           | 5944    |
| #14           | (Gradient Boosting Machine):ti,ab,kw OR (Nomogram):ti,ab,kw OR (XGboost):ti,ab,kw OR (Decision tree):ti,ab,kw OR (External validation):ti,ab,kw                                                  | 2947    |
| #15           | #11 or #12 #13#14                                                                                                                                                                                | 11773   |
| #16           | ("Subtype"):ti,ab,kw OR ("HR-Negative"):ti,ab,kw OR ("ERBB2-Negative"):ti,ab,kw OR ("ERBB2-Positive"):ti,ab,kw OR ("HR-Positive"):ti,ab,kw                                                       | 5436    |
| #17           | (Triple-Negative Breast Cancer):ti,ab,kw OR (Triple Negative Breast Cancer):ti,ab,kw OR (Luminal A):ti,ab,kw OR (Luminal B):ti,ab,kw OR (HER 2):ti,ab,kw                                         | 10064   |
| #18           | #16 or #17                                                                                                                                                                                       | 14977   |
| #19           | #10 and #15 and #18                                                                                                                                                                              | 55      |

### 3. Embase

| Search number | Query                                                                                                                                                                                                                                                                                                                                                                                                                                                                                                                                                                                                                                                                                                                                                                                                                                                                                                                                                                                                                                                                                                                                                                                                                                   | Results |
|---------------|-----------------------------------------------------------------------------------------------------------------------------------------------------------------------------------------------------------------------------------------------------------------------------------------------------------------------------------------------------------------------------------------------------------------------------------------------------------------------------------------------------------------------------------------------------------------------------------------------------------------------------------------------------------------------------------------------------------------------------------------------------------------------------------------------------------------------------------------------------------------------------------------------------------------------------------------------------------------------------------------------------------------------------------------------------------------------------------------------------------------------------------------------------------------------------------------------------------------------------------------|---------|
| #1            | 'breast tumor'/exp                                                                                                                                                                                                                                                                                                                                                                                                                                                                                                                                                                                                                                                                                                                                                                                                                                                                                                                                                                                                                                                                                                                                                                                                                      | 627085  |
| #2            | breast neoplasms':ab,ti OR 'breast neoplasm':ab,ti OR 'neoplasm, breast':ab,ti OR 'breast tumors':ab,ti OR 'breast tumor':ab,ti OR 'tumor, breast':ab,ti OR 'tumors, breast':ab,ti OR 'neoplasms, breast':ab,ti OR 'breast cancer':ab,ti OR 'cancer, breast':ab,ti OR 'mammary cancer':ab,ti OR 'cancer, mammary':ab,ti OR 'cancers, mammary':ab,ti OR 'mammary cancers':ab,ti OR 'malignant neoplasm of breast':ab,ti OR 'breast malignant neoplasm':ab,ti OR 'breast malignant neoplasms':ab,ti OR 'malignant tumor of breast':ab,ti OR 'breast malignant tumor':ab,ti OR 'breast malignant tumors':ab,ti OR 'cancer of breast':ab,ti OR 'cancer of the breast':ab,ti OR 'mammary carcinoma, human':ab,ti OR 'carcinoma, human mammary':ab,ti OR 'carcinomas, human mammary':ab,ti OR 'human mammary carcinomas':ab,ti OR 'mammary carcinomas, human':ab,ti OR 'human mammary carcinoma':ab,ti OR 'mammary neoplasms, human':ab,ti OR 'human mammary neoplasm':ab,ti OR 'human mammary neoplasms':ab,ti OR 'neoplasm, human mammary':ab,ti OR 'neoplasms, human mammary':ab,ti OR 'mammary neoplasm, human':ab,ti OR 'breast carcinoma':ab,ti OR 'breast carcinomas':ab,ti OR 'carcinoma, breast':ab,ti OR 'carcinomas, breast':ab,ti | 484925  |
| #3            | #1 OR #2                                                                                                                                                                                                                                                                                                                                                                                                                                                                                                                                                                                                                                                                                                                                                                                                                                                                                                                                                                                                                                                                                                                                                                                                                                | 679245  |
| #4            | 'machine learning'/exp                                                                                                                                                                                                                                                                                                                                                                                                                                                                                                                                                                                                                                                                                                                                                                                                                                                                                                                                                                                                                                                                                                                                                                                                                  | 310083  |
| #5            | 'machine learning':ab,ti OR 'transfer learning':ab,ti OR 'deep learning':ab,ti OR 'ensemble learning':ab,ti OR 'artificial intelligence':ab,ti OR 'prediction model':ab,ti OR 'random forest':ab,ti OR 'artificial neural network':ab,ti OR 'support vector machine':ab,ti OR svm:ab,ti OR 'gradient boosting machine':ab,ti OR nomogram:ab,ti OR xgboost:ab,ti OR 'decision tree':ab,ti OR 'external validation':ab,ti                                                                                                                                                                                                                                                                                                                                                                                                                                                                                                                                                                                                                                                                                                                                                                                                                 | 196188  |
| #6            | #4 OR #5                                                                                                                                                                                                                                                                                                                                                                                                                                                                                                                                                                                                                                                                                                                                                                                                                                                                                                                                                                                                                                                                                                                                                                                                                                | 393525  |
| #7            | subtype:ab,ti OR 'hr positive':ab,ti OR 'hr negative':ab,ti OR 'erbb2 positive':ab,ti OR 'erbb2 negative':ab,ti OR 'triple-negative breast cancer':ab,ti OR 'triple negative breast cancer':ab,ti OR 'luminal a':ab,ti OR 'luminal b':ab,ti OR 'her 2':ab,ti                                                                                                                                                                                                                                                                                                                                                                                                                                                                                                                                                                                                                                                                                                                                                                                                                                                                                                                                                                            | 208598  |
| #8            | #3 AND #6 AND #7                                                                                                                                                                                                                                                                                                                                                                                                                                                                                                                                                                                                                                                                                                                                                                                                                                                                                                                                                                                                                                                                                                                                                                                                                        | 1354    |

4. Web of science

| Search number | Query                                                                                                                                                                                                                                                                                                                                                                                                                                                                                                                                                                                                                                                                                                                                                                                                                                                                                                                                                                                                                                                                                                                                                                                                                                                                                                                | Results   |
|---------------|----------------------------------------------------------------------------------------------------------------------------------------------------------------------------------------------------------------------------------------------------------------------------------------------------------------------------------------------------------------------------------------------------------------------------------------------------------------------------------------------------------------------------------------------------------------------------------------------------------------------------------------------------------------------------------------------------------------------------------------------------------------------------------------------------------------------------------------------------------------------------------------------------------------------------------------------------------------------------------------------------------------------------------------------------------------------------------------------------------------------------------------------------------------------------------------------------------------------------------------------------------------------------------------------------------------------|-----------|
| #1            | Breast Neoplasms (Subject) or Breast Neoplasm (Subject) or Neoplasm, Breast (Subject) or Breast Tumors (Subject) or Breast Tumor (Subject) or Tumor, Breast (Subject) or Tumors, Breast (Subject) or Neoplasms, Breast (Subject) or Breast Cancer (Subject) or Cancer, Breast (Subject) or Mammary Cancer (Subject) or Cancer, Mammary (Subject) or Cancers, Mammary (Subject) or Mammary Cancers (Subject) or Malignant Neoplasm of Breast (Subject) or Breast Malignant Neoplasm (Subject) or Breast Malignant Neoplasms (Subject) or Malignant Tumor of Breast (Subject) or Breast Malignant Tumor (Subject) or Breast Malignant Tumors (Subject) or Cancer of Breast (Subject) or Cancer of the Breast (Subject) or Mammary Carcinoma, Human (Subject) or Carcinoma, Human Mammary (Subject) or Carcinomas, Human Mammary (Subject) or Human Mammary Carcinomas (Subject) or Mammary Carcinomas, Human (Subject) or Human Mammary Carcinoma (Subject) or Mammary Neoplasms, Human (Subject) or Human Mammary Neoplasm (Subject) or Human Mammary Neoplasms (Subject) or Neoplasm, Human Mammary (Subject) or Neoplasms, Human Mammary (Subject) or Mammary Neoplasm, Human (Subject) or Breast Carcinoma (Subject) or Breast Carcinomas (Subject) or Carcinoma, Breast (Subject) or Carcinomas, Breast (Subject) | 675198    |
| #2            | #2.machine learning (Subject) or Transfer Learning (Subject) or Deep learning (Subject) or Ensemble Learning (Subject) or artificial intelligence (Subject) or Prediction model (Subject) or random forest (Subject) or artificial neural network (Subject) or Support vector machine (Subject) or SVM (Subject) or Gradient Boosting Machine (Subject) or Nomogram (Subject) or XGboost (Subject) or Decision tree (Subject) or External validation (Subject)                                                                                                                                                                                                                                                                                                                                                                                                                                                                                                                                                                                                                                                                                                                                                                                                                                                       | 1,557,616 |
| #3            | #3Subtype (Subject) or HR-Positive (Subject) or HR-Negative (Subject) or ERBB2-Positive (Subject) or ERBB2-Negative (Subject) or Triple-Negative Breast Cancer (Subject) or Triple Negative Breast Cancer (Subject) or Luminal A (Subject) or Luminal B (Subject) or HER 2 (Subject)                                                                                                                                                                                                                                                                                                                                                                                                                                                                                                                                                                                                                                                                                                                                                                                                                                                                                                                                                                                                                                 | 370,096   |
| #4            | #1and#2and#3                                                                                                                                                                                                                                                                                                                                                                                                                                                                                                                                                                                                                                                                                                                                                                                                                                                                                                                                                                                                                                                                                                                                                                                                                                                                                                         | 1531      |
